# Supplementary material for: Sociodemographic Characteristics and Mental and Physical Health Diagnoses of Yazidi Refugees Who Survived the Daesh Genocide and Resettled in Canada
Source: PubMed Central journal article supplement (PMC10339151; doi:10.1001/jamanetworkopen.2023.23064), 2023-07-12
Supplement: jamanetwopen-e2323064-s001.pdf [file jamanetwopen-e2323064-s001.pdf]

## Supplementary Online Content

Hassan N, Coakley A, Al Masri I, et al. Sociodemographic Characteristics and Mental and Physical Health Diagnoses of Yazidi Refugees Who Survived the Daesh Genocide and Resettled in Canada. *JAMA Netw Open*. 2023;6(7):e2323064.

doi:10.1001/jamanetworkopen.2023.23064

**eFigure.** Heat Map Analysis of *ICD-10-CM* Chapters Among Yazidi Refugees by Age and Sex

**eTable 1.** Top 5 Most Prevalent *ICD-10-CM* Diagnoses by *ICD-10-CM* Chapter Among Yazidi Refugees (n = 230)

**eTable 2.** Top 30 *ICD-10-CM* Diagnoses Among Yazidi Refugees (n = 230)

**eTable 3.** Frequency of *ICD-10-CM* Diagnoses Among Children Aged 6 Months to 11 Years (n = 67)

**eTable 4.** Frequency of *ICD-10-CM* Diagnoses Among Adolescents Aged 12 to 17 Years (n = 37)

**eTable 5.** Frequency of *ICD-10-CM* Diagnoses Among Female Adults 18 Years or Older (n = 81)

**eTable 6.** Frequency of *ICD-10-CM* Diagnoses Among Male Adults 18 Years or Older (n = 45)

This supplemental material has been provided by the authors to give readers additional information about their work.

**eFigure.** Heat Map Analysis of *ICD-10-CM* Chapters Among Yazidi Refugees by Age and Sex

| ICD-10-CM Chapter | Description                                                                                                 | Overall (n=230) | Children (n = 67) | Adolescent (n = 37) | Female Adults (n = 81) | Male Adults (n = 45) |
|-------------------|-------------------------------------------------------------------------------------------------------------|-----------------|-------------------|---------------------|------------------------|----------------------|
| 18                | R00–R99 Symptoms, signs and abnormal clinical and laboratory findings, not elsewhere classified             | 49.1            | 43.3              | 37.8                | 58.0                   | 51.1                 |
| 4                 | E00–E90 Endocrine, nutritional and metabolic diseases                                                       | 37.4            | 40.3              | 37.8                | 37.0                   | 33.3                 |
| 5                 | F00–F99 Mental and behavioural disorders                                                                    | 33.5            | 25.4              | 24.3                | 54.3                   | 15.6                 |
| 1                 | A00–B99 Certain infectious and parasitic diseases                                                           | 31.3            | 38.8              | 21.6                | 30.9                   | 28.9                 |
| 13                | M00–M99 Diseases of the musculoskeletal system and connective tissue                                        | 28.7            | 9.0               | 21.6                | 40.7                   | 42.2                 |
| 11                | K00–K93 Diseases of the digestive system                                                                    | 27.0            | 16.4              | 2.7                 | 37.0                   | 44.4                 |
| 14                | N00–N99 Diseases of the genitourinary system                                                                | 21.7            | 9.0               | 10.8                | 43.2                   | 11.1                 |
| 7                 | H00–H59 Diseases of the eye and adnexa                                                                      | 21.7            | 9.0               | 29.7                | 25.9                   | 26.7                 |
| 3                 | D50–D89 Diseases of the blood and blood-forming organs and certain disorders involving the immune mechanism | 21.3            | 17.9              | 35.1                | 24.7                   | 8.9                  |
| 12                | L00–L99 Diseases of the skin and subcutaneous tissue                                                        | 20.0            | 11.9              | 16.2                | 27.2                   | 22.2                 |
| 10                | J00–J99 Diseases of the respiratory system                                                                  | 15.7            | 23.9              | 2.7                 | 11.1                   | 22.2                 |
| 19                | S00–T98 Injury, poisoning, and certain other consequences of external causes                                | 11.7            | 11.9              | 13.5                | 14.8                   | 4.4                  |
| 6                 | G00–G99 Diseases of the nervous system                                                                      | 10.4            | 0.0               | 5.4                 | 23.5                   | 6.7                  |
| 8                 | H60–H95 Diseases of the ear and mastoid process                                                             | 9.6             | 6.0               | 2.7                 | 12.3                   | 15.6                 |
| 9                 | I00–I99 Diseases of the circulatory system                                                                  | 6.1             | 0.0               | 0.0                 | 12.3                   | 8.9                  |
| 2                 | C00–D48 Neoplasms                                                                                           | 5.2             | 9.0               | 0.0                 | 6.2                    | 2.2                  |
| 20                | V01–Y98 External causes of morbidity and mortality                                                          | 4.8             | 3.0               | 2.7                 | 9.9                    | 0.0                  |
| 21                | Z00–Z99 Factors influencing health status and contact with health services                                  | 2.6             | 0.0               | 0.0                 | 6.2                    | 2.2                  |
| 17                | Q00–Q99 Congenital malformations, deformations, and chromosomal abnormalities                               | 2.2             | 6.0               | 0.0                 | 1.2                    | 0.0                  |
| 15                | O00–O99 Pregnancy, childbirth, and the puerperium                                                           | 1.3             | 0.0               | 0.0                 | 3.7                    | 0.0                  |

Prevalence of diagnostic chapter (% of diagnoses in each age group)

**eTable 1.** Top 5 Most Prevalent *ICD-10-CM* Diagnoses by *ICD-10-CM* Chapter Among Yazidi Refugees (n = 230)

Chapters are ordered from most to least prevalent. Not shown are *ICD-10-CM* chapters prevalent in fewer than 10% of the entire cohort.

| <b>ICD-10-CM chapter</b>                                | <b>ICD-10 code</b> | <b>ICD-10 description</b>                      | <b>n</b> | <b>%</b> |
|---------------------------------------------------------|--------------------|------------------------------------------------|----------|----------|
| R00–R99: Symptoms, signs and abnormal clinical findings | R10                | Abdominal and pelvic pain                      | 47       | 20.4     |
|                                                         | R51                | Headache                                       | 19       | 8.3      |
|                                                         | R31                | Unspecified haematuria                         | 18       | 7.8      |
|                                                         | R30.0              | Dysuria                                        | 11       | 4.8      |
|                                                         | R21                | Rash                                           | 9        | 3.9      |
| E00–E90: Endocrine, nutritional and metabolic diseases  | E61.1              | Iron deficiency                                | 43       | 18.7     |
|                                                         | E78                | Dyslipidemia                                   | 24       | 10.4     |
|                                                         | E34.3              | Short stature, not elsewhere classified        | 10       | 4.3      |
|                                                         | E53.8              | Deficiency of other specified B group vitamins | 7        | 3.0      |
|                                                         | E66                | Obesity                                        | 6        | 2.6      |
| F00–F99: Mental and behavioural disorders               | F43.1              | Post-traumatic stress disorder                 | 33       | 14.3     |
|                                                         | F51.0              | Nonorganic insomnia                            | 19       | 8.3      |
|                                                         | F32.9              | Depression                                     | 13       | 5.7      |
|                                                         | F41                | Other anxiety disorders                        | 13       | 5.7      |
|                                                         | F44.5              | Psychogenic non-epileptic seizures             | 11       | 4.8      |
| A00–B99: Infectious and parasitic diseases              | B80                | Enterobiasis                                   | 19       | 8.3      |
|                                                         | B98.0              | Helicobacter pylori [H.pylori]                 | 15       | 6.5      |
|                                                         | A07.1              | Giardia                                        | 9        | 3.9      |
|                                                         | A15.9              | Respiratory tuberculosis unspecified           | 9        | 3.9      |
|                                                         | B65                | Schistosomiasis [bilharziasis]                 | 9        | 3.9      |
| M00–M99: Musculoskeletal conditions                     | M54.5              | Low back pain                                  | 26       | 11.3     |
|                                                         | M25.5              | Pain in joint                                  | 19       | 8.3      |
|                                                         | M79.6              | Pain in leg                                    | 13       | 5.7      |
|                                                         | M62.6              | Muscle strain                                  | 6        | 2.6      |
|                                                         | M21.9              | Acquired deformity of limb, unspecified        | CS       | CS       |
| K00–K93: Diseases of the digestive system               | K02                | Dental caries                                  | 24       | 10.4     |
|                                                         | K59.0              | Constipation                                   | 14       | 6.1      |
|                                                         | K64                | Hemorrhoids                                    | 10       | 4.3      |
|                                                         | K08.8              | Dental pain                                    | 9        | 3.9      |
|                                                         | K29.7              | Gastritis                                      | 6        | 2.6      |
|                                                         | N39.0              | Urinary tract infection, site not specified    | 10       | 4.3      |
|                                                         | N76.0              | Acute vaginitis                                | 8        | 3.5      |

|                                               |       |                                                     |    |      |
|-----------------------------------------------|-------|-----------------------------------------------------|----|------|
| N00–N99:<br>Gynecologic<br>conditions         | N94.6 | Dysmenorrhoea, unspecified                          | 7  | 3    |
|                                               | N39.4 | Other specified urinary incontinence                | 6  | 2.6  |
|                                               | N92.0 | Menorrhagia                                         | CS | CS   |
| H00–H59:<br>Conditions of vision              | H53   | Visual disturbances                                 | 22 | 9.6  |
|                                               | H52   | Disorders of refraction and accommodation           | 14 | 6.1  |
|                                               | H26   | Other cataract                                      | CS | CS   |
|                                               | H11.0 | Pterygium                                           | CS | CS   |
|                                               | H52.2 | Astigmatism                                         | CS | CS   |
| D50–D89: Blood<br>conditions                  | D50   | Iron deficiency anaemia                             | 36 | 15.7 |
|                                               | D47.3 | Thrombocytosis                                      | 8  | 3.5  |
|                                               | D72.1 | Eosinophilia                                        | 5  | 2.2  |
|                                               | D56.3 | Thalassaemia trait                                  | CS | CS   |
|                                               | D64   | Other anaemias                                      | CS | CS   |
| L00–L99: Skin<br>conditions                   | L70   | Acne                                                | 14 | 6.1  |
|                                               | L30.9 | Dermatitis, unspecified                             | 8  | 3.5  |
|                                               | L65   | Hair loss                                           | 6  | 2.6  |
|                                               | L25   | Unspecified contact dermatitis                      | CS | CS   |
|                                               | L29   | Pruritus                                            | CS | CS   |
| J00–J99:<br>Respiratory<br>conditions         | J06   | Upper Respiratory Tract Infection                   | 26 | 11.3 |
|                                               | J34.8 | Other specified disorders of nose and nasal sinuses | CS | CS   |
|                                               | J02   | Acute pharyngitis                                   | CS | CS   |
|                                               | J01   | Acute sinusitis                                     | CS | CS   |
|                                               | J02.0 | Streptococcal pharyngitis                           | CS | CS   |
| S00–T98: Injury and<br>poisoning              | T74.2 | Sexual abuse                                        | 8  | 3.5  |
|                                               | T74.1 | Physical abuse                                      | 5  | 2.2  |
|                                               | S61   | Open wound of wrist and hand                        | CS | CS   |
|                                               | S62.8 | Fracture of wrist                                   | CS | CS   |
|                                               | S82.8 | Fracture of ankle                                   | CS | CS   |
| G00–G99: Diseases<br>of the nervous<br>system | G44.2 | Tension-type headache                               | 11 | 4.8  |
|                                               | G43   | Migraine                                            | 10 | 4.3  |
|                                               | G62.9 | Polyneuropathy, unspecified                         | CS | CS   |
|                                               | G47.9 | Sleep disorder, unspecified                         | CS | CS   |
|                                               | G82.2 | Paraplegia, unspecified                             | CS | CS   |

Abbreviation: CS, Cell Suppression. Cells with fewer than 5 participants were suppressed to protect participant confidentiality.

**eTable 2.** Top 30 *ICD-10-CM* Diagnoses Among Yazidi Refugees (n = 230)

| <b>ICD-10-CM code</b> | <b>Description</b>                                                                   | <b>n</b> | <b>%</b> |
|-----------------------|--------------------------------------------------------------------------------------|----------|----------|
| R10                   | Abdominal and pelvic pain                                                            | 47       | 20.4     |
| E61.1                 | Iron deficiency                                                                      | 43       | 18.7     |
| D50                   | Iron deficiency anaemia                                                              | 36       | 15.7     |
| F43.1                 | Post-traumatic stress disorder                                                       | 33       | 14.3     |
| J06                   | Acute upper respiratory infections of multiple and unspecified sites                 | 26       | 11.3     |
| M54.5                 | Low back pain                                                                        | 26       | 11.3     |
| E78                   | Disorders of lipoprotein metabolism and other lipidaemias                            | 24       | 10.4     |
| K02                   | Dental caries                                                                        | 24       | 10.4     |
| H53                   | Visual disturbances                                                                  | 22       | 9.6      |
| B80                   | Enterobiasis                                                                         | 19       | 8.3      |
| F51.0                 | Nonorganic insomnia                                                                  | 19       | 8.3      |
| M25.5                 | Pain in joint                                                                        | 19       | 8.3      |
| R51                   | Headache                                                                             | 19       | 8.3      |
| R31                   | Unspecified haematuria                                                               | 18       | 7.8      |
| B98.0                 | Helicobacter pylori [H.pylori] as the cause of diseases classified to other chapters | 15       | 6.5      |
| H52                   | Disorders of refraction and accommodation                                            | 14       | 6.1      |
| K59.0                 | Constipation                                                                         | 14       | 6.1      |
| L70                   | Acne                                                                                 | 14       | 6.1      |
| F32.9                 | Depressive episode, unspecified                                                      | 13       | 5.7      |
| F41                   | Other anxiety disorders                                                              | 13       | 5.7      |
| H91                   | Other hearing loss                                                                   | 13       | 5.7      |
| M79.6                 | Pain in limb                                                                         | 13       | 5.7      |
| I10                   | Essential (primary) hypertension                                                     | 12       | 5.2      |
| F44.5                 | Psychogenic non-epileptic seizures                                                   | 11       | 4.8      |
| G44.2                 | Tension-type headache                                                                | 11       | 4.8      |
| R30.0                 | Dysuria                                                                              | 11       | 4.8      |
| E34.3                 | Short stature, not elsewhere classified                                              | 10       | 4.3      |
| G43                   | Migraine                                                                             | 10       | 4.3      |
| K64                   | Haemorrhoids and perianal venous thrombosis                                          | 10       | 4.3      |
| N39.0                 | Urinary tract infection, site not specified                                          | 10       | 4.3      |

**eTable 3.** Frequency of *ICD-10-CM* Diagnoses Among Children Aged 6 Months to 11 Years (n = 67)

| <b>ICD-10-CM code</b> | <b>Description</b>                                                                   | <b>n</b> | <b>%</b> |
|-----------------------|--------------------------------------------------------------------------------------|----------|----------|
| E61.1                 | Iron deficiency                                                                      | 19       | 28.4     |
| J06                   | Acute upper respiratory infections of multiple and unspecified sites                 | 13       | 19.4     |
| R10                   | Abdominal and pelvic pain                                                            | 13       | 19.4     |
| B80                   | Enterobiasis                                                                         | 12       | 17.9     |
| E34.3                 | Short stature, not elsewhere classified                                              | 8        | 11.9     |
| K02                   | Dental caries                                                                        | 8        | 11.9     |
| D50                   | Iron deficiency anaemia                                                              | 7        | 10.4     |
| F50.9                 | Eating disorder, unspecified                                                         | 7        | 10.4     |
| A07.1                 | Giardiasis [lambliasis]                                                              | 6        | 9.0      |
| R31                   | Unspecified haematuria                                                               | 6        | 9.0      |
| A07.8                 | Other specified protozoal intestinal diseases                                        | 5        | 7.5      |
| D47.3                 | Essential (haemorrhagic) thrombocythaemia                                            | 5        | 7.5      |
| L30.9                 | Dermatitis, unspecified                                                              | 5        | 7.5      |
| R30.0                 | Dysuria                                                                              | 5        | 7.5      |
| B07                   | Viral warts                                                                          | CS       | CS       |
| F43.1                 | Post-traumatic stress disorder                                                       | CS       | CS       |
| K59.0                 | Constipation                                                                         | CS       | CS       |
| T74.1                 | Physical abuse                                                                       | CS       | CS       |
| B65                   | Schistosomiasis [bilharziasis]                                                       | CS       | CS       |
| B71.0                 | Hymenolepiasis                                                                       | CS       | CS       |
| D72.1                 | Eosinophilia                                                                         | CS       | CS       |
| F98.0                 | Nonorganic enuresis                                                                  | CS       | CS       |
| H52                   | Disorders of refraction and accommodation                                            | CS       | CS       |
| N39.4                 | Other specified urinary incontinence                                                 | CS       | CS       |
| R05                   | Cough                                                                                | CS       | CS       |
| R47.8                 | Other and unspecified speech disturbances                                            | CS       | CS       |
| B98.0                 | Helicobacter pylori [H.pylori] as the cause of diseases classified to other chapters | CS       | CS       |
| D55.0                 | Anaemia due to glucose-6-phosphate dehydrogenase [G6PD] deficiency                   | CS       | CS       |
| F80.9                 | Developmental disorder of speech and language, unspecified                           | CS       | CS       |
| H91                   | Other hearing loss                                                                   | CS       | CS       |
| M25.5                 | Pain in joint                                                                        | CS       | CS       |
| N39.0                 | Urinary tract infection, site not specified                                          | CS       | CS       |
| R01.1                 | Cardiac murmur, unspecified                                                          | CS       | CS       |

|       |                                                                                      |    |    |
|-------|--------------------------------------------------------------------------------------|----|----|
| R32   | Unspecified urinary incontinence                                                     | CS | CS |
| R51   | Headache                                                                             | CS | CS |
| R62.8 | Other lack of expected normal physiological development                              | CS | CS |
| A15.9 | Respiratory tuberculosis unspecified, confirmed bacteriologically and histologically | CS | CS |
| B89   | Unspecified parasitic disease                                                        | CS | CS |
| D48.5 | Neoplasm of uncertain or unknown behaviour: Skin                                     | CS | CS |
| D70   | Agranulocytosis                                                                      | CS | CS |
| E03.9 | Hypothyroidism, unspecified                                                          | CS | CS |
| E53.8 | Deficiency of other specified B group vitamins                                       | CS | CS |
| E66   | Obesity                                                                              | CS | CS |
| F41   | Other anxiety disorders                                                              | CS | CS |
| F43.2 | Adjustment disorders                                                                 | CS | CS |
| F43.8 | Other reactions to severe stress                                                     | CS | CS |
| F82   | Specific developmental disorder of motor function                                    | CS | CS |
| F91.9 | Conduct disorder, unspecified                                                        | CS | CS |
| H02.4 | Ptosis of eyelid                                                                     | CS | CS |
| H50   | Other strabismus                                                                     | CS | CS |
| H53   | Visual disturbances                                                                  | CS | CS |
| H53.2 | Diplopia                                                                             | CS | CS |
| H61.2 | Impacted cerumen                                                                     | CS | CS |
| H91.3 | Deaf mutism, not elsewhere classified                                                | CS | CS |
| H92.0 | Otalgia                                                                              | CS | CS |
| J02.0 | Streptococcal pharyngitis                                                            | CS | CS |
| J18.9 | Pneumonia, unspecified                                                               | CS | CS |
| J31   | Chronic rhinitis, nasopharyngitis and pharyngitis                                    | CS | CS |
| J34.8 | Other specified disorders of nose and nasal sinuses                                  | CS | CS |
| J35.1 | Hypertrophy of tonsils                                                               | CS | CS |
| K04.7 | Periapical abscess without sinus                                                     | CS | CS |
| L05.9 | Pilonidal cyst without abscess                                                       | CS | CS |
| L21   | Seborrhoeic dermatitis                                                               | CS | CS |
| L22   | Diaper [napkin] dermatitis                                                           | CS | CS |
| L65   | Other nonscarring hair loss                                                          | CS | CS |
| M40.2 | Other and unspecified kyphosis                                                       | CS | CS |
| M43.6 | Torticollis                                                                          | CS | CS |
| M54.5 | Low back pain                                                                        | CS | CS |
| M79.6 | Pain in limb                                                                         | CS | CS |
| N13.7 | Vesicoureteral-reflux-associated uropathy                                            | CS | CS |

|              |                                                           |     |     |
|--------------|-----------------------------------------------------------|-----|-----|
| N76.0        | Acute vaginitis                                           | CS  | CS  |
| Q53.1        | Undescended testicle, unilateral                          | CS  | CS  |
| Q55.2        | Other congenital malformations of testis and scrotum      | CS  | CS  |
| Q60.0        | Renal agenesis, unilateral                                | CS  | CS  |
| Q68.8        | Other specified congenital musculoskeletal deformities    | CS  | CS  |
| R04.0        | Epistaxis                                                 | CS  | CS  |
| R11          | Nausea and vomiting                                       | CS  | CS  |
| R21          | Rash and other nonspecific skin eruption                  | CS  | CS  |
| R26.8        | Other and unspecified abnormalities of gait and mobility  | CS  | CS  |
| R27.8        | Other and unspecified lack of coordination                | CS  | CS  |
| R35          | Polyuria                                                  | CS  | CS  |
| R39.1        | Other difficulties with micturition                       | CS  | CS  |
| R42          | Dizziness and giddiness                                   | CS  | CS  |
| R63.1        | Polydipsia                                                | CS  | CS  |
| R80          | Isolated proteinuria                                      | CS  | CS  |
| S05.9        | Injury of eye and orbit, unspecified                      | CS  | CS  |
| S52.3        | Fracture of shaft of radius                               | CS  | CS  |
| S61          | Open wound of wrist and hand                              | CS  | CS  |
| S62.8        | Fracture of other and unspecified parts of wrist and hand | CS  | CS  |
| S91.2        | Open wound of toe(s) with damage to nail                  | CS  | CS  |
| Y05          | Sexual assault by bodily force                            | CS  | CS  |
| Y36.2        | War operations involving other explosions and fragments   | CS  | CS  |
| <b>Total</b> |                                                           | 235 | 100 |

Abbreviation: CS, Cell Suppression. Cells with fewer than 5 participants were suppressed to protect participant confidentiality.



**eTable 4.** Frequency of *ICD-10-CM* Diagnoses Among Adolescents Aged 12 to 17 Years (n = 37)

| <b>ICD-10-CM code</b> | <b>Description</b>                                                                                   | <b>n</b> | <b>%</b> |
|-----------------------|------------------------------------------------------------------------------------------------------|----------|----------|
| D50                   | Iron deficiency anaemia                                                                              | 12       | 32.4     |
| E61.1                 | Iron deficiency                                                                                      | 11       | 29.7     |
| H53                   | Visual disturbances                                                                                  | 6        | 16.2     |
| R31                   | Unspecified haematuria                                                                               | 6        | 16.2     |
| R10                   | Abdominal and pelvic pain                                                                            | 5        | 13.5     |
| F44.5                 | Psychogenic non-epileptic seizures                                                                   | CS       | CS       |
| L70                   | Acne                                                                                                 | CS       | CS       |
| N94.6                 | Dysmenorrhoea, unspecified                                                                           | CS       | CS       |
| B80                   | Enterobiasis                                                                                         | CS       | CS       |
| F43.1                 | Post-traumatic stress disorder                                                                       | CS       | CS       |
| H52                   | Disorders of refraction and accommodation                                                            | CS       | CS       |
| M21.9                 | Acquired deformity of limb, unspecified                                                              | CS       | CS       |
| R51                   | Headache                                                                                             | CS       | CS       |
| B65                   | Schistosomiasis [bilharziasis]                                                                       | CS       | CS       |
| D70                   | Agranulocytosis                                                                                      | CS       | CS       |
| E53.8                 | Deficiency of other specified B group vitamins                                                       | CS       | CS       |
| F51.0                 | Nonorganic insomnia                                                                                  | CS       | CS       |
| G43                   | Migraine                                                                                             | CS       | CS       |
| M25.5                 | Pain in joint                                                                                        | CS       | CS       |
| M54.5                 | Low back pain                                                                                        | CS       | CS       |
| M79.6                 | Pain in limb                                                                                         | CS       | CS       |
| T74.2                 | Sexual abuse                                                                                         | CS       | CS       |
| A07.1                 | Giardiasis [lambliasis]                                                                              | CS       | CS       |
| B00                   | Herpesviral [herpes simplex] infections                                                              | CS       | CS       |
| B07                   | Viral warts                                                                                          | CS       | CS       |
| B85.0                 | Pediculosis due to <i>Pediculus humanus capitis</i>                                                  | CS       | CS       |
| B98.0                 | <i>Helicobacter pylori</i> [ <i>H.pylori</i> ] as the cause of diseases classified to other chapters | CS       | CS       |
| D72.1                 | Eosinophilia                                                                                         | CS       | CS       |
| E34.3                 | Short stature, not elsewhere classified                                                              | CS       | CS       |
| F43.2                 | Adjustment disorders                                                                                 | CS       | CS       |
| F51.3                 | Sleepwalking [somnambulism]                                                                          | CS       | CS       |
| F51.4                 | Sleep terrors [night terrors]                                                                        | CS       | CS       |
| F51.5                 | Nightmares                                                                                           | CS       | CS       |
| H43.3                 | Other vitreous opacities                                                                             | CS       | CS       |

|              |                                                                          |     |     |
|--------------|--------------------------------------------------------------------------|-----|-----|
| H54          | Visual impairment including blindness (binocular or monocular)           | CS  | CS  |
| H91.3        | Deaf mutism, not elsewhere classified                                    | CS  | CS  |
| J06          | Acute upper respiratory infections of multiple and unspecified sites     | CS  | CS  |
| K02          | Dental caries                                                            | CS  | CS  |
| L21          | Seborrhoeic dermatitis                                                   | CS  | CS  |
| L85.3        | Xerosis cutis                                                            | CS  | CS  |
| M62.6        | Muscle strain                                                            | CS  | CS  |
| N76.0        | Acute vaginitis                                                          | CS  | CS  |
| R01.1        | Cardiac murmur, unspecified                                              | CS  | CS  |
| R05          | Cough                                                                    | CS  | CS  |
| R25.2        | Cramp and spasm                                                          | CS  | CS  |
| R42          | Dizziness and giddiness                                                  | CS  | CS  |
| R80          | Isolated proteinuria                                                     | CS  | CS  |
| S06.0        | Concussion                                                               | CS  | CS  |
| S60.0        | Contusion of finger(s) without damage to nail                            | CS  | CS  |
| T13.5        | Injury of unspecified muscle and tendon of lower limb, level unspecified | CS  | CS  |
| Y05          | Sexual assault by bodily force                                           | CS  | CS  |
| <b>Total</b> |                                                                          | 114 | 100 |

Abbreviation: CS, Cell Suppression. Cells with fewer than 5 participants were suppressed to protect participant confidentiality.

**eTable 5.** Frequency of *ICD-10-CM* Diagnoses Among Female Adults 18 Years or Older (n = 81)

| <b>ICD-10-CM code</b> | <b>Description</b>                                                                   | <b>n</b> | <b>%</b> |
|-----------------------|--------------------------------------------------------------------------------------|----------|----------|
| F43.1                 | Post-traumatic stress disorder                                                       | 25       | 30.9     |
| R10                   | Abdominal and pelvic pain                                                            | 21       | 25.9     |
| F51.0                 | Nonorganic insomnia                                                                  | 17       | 21.0     |
| M54.5                 | Low back pain                                                                        | 17       | 21.0     |
| D50                   | Iron deficiency anaemia                                                              | 16       | 19.8     |
| E78                   | Disorders of lipoprotein metabolism and other lipidaemias                            | 13       | 16.0     |
| R51                   | Headache                                                                             | 13       | 16.0     |
| F32.9                 | Depressive episode, unspecified                                                      | 12       | 14.8     |
| E61.1                 | Iron deficiency                                                                      | 11       | 13.6     |
| F41                   | Other anxiety disorders                                                              | 10       | 12.3     |
| H53                   | Visual disturbances                                                                  | 10       | 12.3     |
| G44.2                 | Tension-type headache                                                                | 9        | 11.1     |
| L70                   | Acne                                                                                 | 9        | 11.1     |
| M25.5                 | Pain in joint                                                                        | 9        | 11.1     |
| B98.0                 | Helicobacter pylori [H.pylori] as the cause of diseases classified to other chapters | 8        | 9.9      |
| G43                   | Migraine                                                                             | 8        | 9.9      |
| I10                   | Essential (primary) hypertension                                                     | 8        | 9.9      |
| K02                   | Dental caries                                                                        | 8        | 9.9      |
| N39.0                 | Urinary tract infection, site not specified                                          | 8        | 9.9      |
| F44.5                 | Psychogenic non-epileptic seizures                                                   | 7        | 8.6      |
| J06                   | Acute upper respiratory infections of multiple and unspecified sites                 | 7        | 8.6      |
| M79.6                 | Pain in limb                                                                         | 7        | 8.6      |
| H91                   | Other hearing loss                                                                   | 6        | 7.4      |
| N76.0                 | Acute vaginitis                                                                      | 6        | 7.4      |
| T74.2                 | Sexual abuse                                                                         | 6        | 7.4      |
| A15.9                 | Respiratory tuberculosis unspecified, confirmed bacteriologically and histologically | 5        | 6.2      |
| E11                   | Type 2 diabetes mellitus                                                             | 5        | 6.2      |
| F41.0                 | Panic disorder [episodic paroxysmal anxiety]                                         | 5        | 6.2      |
| H52                   | Disorders of refraction and accommodation                                            | 5        | 6.2      |
| K59.0                 | Constipation                                                                         | 5        | 6.2      |
| K64                   | Haemorrhoids and perianal venous thrombosis                                          | 5        | 6.2      |
| R30.0                 | Dysuria                                                                              | 5        | 6.2      |
| R31                   | Unspecified haematuria                                                               | 5        | 6.2      |
| R42                   | Dizziness and giddiness                                                              | 5        | 6.2      |

|       |                                                                        |    |    |
|-------|------------------------------------------------------------------------|----|----|
| B37.3 | Candidiasis of vulva and vagina                                        | CS | CS |
| F51.5 | Nightmares                                                             | CS | CS |
| K08.8 | Other specified disorders of teeth and supporting structures           | CS | CS |
| K29.7 | Gastritis, unspecified                                                 | CS | CS |
| L65   | Other nonscarring hair loss                                            | CS | CS |
| M62.6 | Muscle strain                                                          | CS | CS |
| N92.0 | Excessive and frequent menstruation with regular cycle                 | CS | CS |
| R06.0 | Dyspnoea                                                               | CS | CS |
| Y05   | Sexual assault by bodily force                                         | CS | CS |
| Y07   | Other maltreatment                                                     | CS | CS |
| B80   | Enterobiasis                                                           | CS | CS |
| D47.3 | Essential (haemorrhagic) thrombocythaemia                              | CS | CS |
| D56.3 | Thalassaemia trait                                                     | CS | CS |
| D64   | Other anaemias                                                         | CS | CS |
| E03.9 | Hypothyroidism, unspecified                                            | CS | CS |
| E53.8 | Deficiency of other specified B group vitamins                         | CS | CS |
| E66   | Obesity                                                                | CS | CS |
| F43.8 | Other reactions to severe stress                                       | CS | CS |
| G62.9 | Polyneuropathy, unspecified                                            | CS | CS |
| H26   | Other cataract                                                         | CS | CS |
| I51.7 | Cardiomegaly                                                           | CS | CS |
| K04.7 | Periapical abscess without sinus                                       | CS | CS |
| M54.3 | Sciatica                                                               | CS | CS |
| N89.8 | Other specified noninflammatory disorders of vagina                    | CS | CS |
| N92.6 | Irregular menstruation, unspecified                                    | CS | CS |
| N94.6 | Dysmenorrhoea, unspecified                                             | CS | CS |
| O03   | Spontaneous abortion                                                   | CS | CS |
| R05   | Cough                                                                  | CS | CS |
| R11   | Nausea and vomiting                                                    | CS | CS |
| R21   | Rash and other nonspecific skin eruption                               | CS | CS |
| A09.0 | Other and unspecified gastroenteritis and colitis of infectious origin | CS | CS |
| B65   | Schistosomiasis [bilharziasis]                                         | CS | CS |
| D69.6 | Thrombocytopenia, unspecified                                          | CS | CS |
| F43.2 | Adjustment disorders                                                   | CS | CS |
| H11.0 | Pterygium                                                              | CS | CS |
| H52.2 | Astigmatism                                                            | CS | CS |
| H54   | Visual impairment including blindness (binocular or monocular)         | CS | CS |

|       |                                                               |    |    |
|-------|---------------------------------------------------------------|----|----|
| H61.2 | Impacted cerumen                                              | CS | CS |
| I25   | Chronic ischaemic heart disease                               | CS | CS |
| K04.9 | Other and unspecified diseases of pulp and periapical tissues | CS | CS |
| K13.7 | Other and unspecified lesions of oral mucosa                  | CS | CS |
| K21   | Gastro-oesophageal reflux disease                             | CS | CS |
| K30   | Functional dyspepsia                                          | CS | CS |
| K76.0 | Fatty (change of) liver, not elsewhere classified             | CS | CS |
| L25   | Unspecified contact dermatitis                                | CS | CS |
| L29   | Pruritus                                                      | CS | CS |
| M19   | Other arthrosis                                               | CS | CS |
| M41.9 | Scoliosis, unspecified                                        | CS | CS |
| M51.3 | Other specified intervertebral disc degeneration              | CS | CS |
| N18   | Chronic kidney disease                                        | CS | CS |
| N20.0 | Calculus of kidney                                            | CS | CS |
| N28.1 | Cyst of kidney, acquired                                      | CS | CS |
| N30.9 | Cystitis, unspecified                                         | CS | CS |
| N39.4 | Other specified urinary incontinence                          | CS | CS |
| N63   | Unspecified lump in breast                                    | CS | CS |
| N64.4 | Mastodynia                                                    | CS | CS |
| N83.2 | Other and unspecified ovarian cysts                           | CS | CS |
| N91.2 | Amenorrhoea, unspecified                                      | CS | CS |
| N97   | Female infertility                                            | CS | CS |
| R07   | Pain in throat and chest                                      | CS | CS |
| R19.6 | Halitosis                                                     | CS | CS |
| R22.2 | Localized swelling, mass and lump, trunk                      | CS | CS |
| R52   | Pain, not elsewhere classified                                | CS | CS |
| R53   | Malaise and fatigue                                           | CS | CS |
| Z34.9 | Supervision of normal pregnancy, unspecified                  | CS | CS |
| A04.7 | Enterocolitis due to Clostridium difficile                    | CS | CS |
| A07.1 | Giardiasis [lambliasis]                                       | CS | CS |
| A07.8 | Other specified protozoal intestinal diseases                 | CS | CS |
| B07   | Viral warts                                                   | CS | CS |
| B36.9 | Superficial mycosis, unspecified                              | CS | CS |
| B64   | Unspecified protozoal disease                                 | CS | CS |
| C06.0 | Cheek mucosa                                                  | CS | CS |
| D25.9 | Leiomyoma of uterus, unspecified                              | CS | CS |
| D68.9 | Coagulation defect, unspecified                               | CS | CS |
| D72.1 | Eosinophilia                                                  | CS | CS |

|       |                                                    |    |    |
|-------|----------------------------------------------------|----|----|
| E04   | Other nontoxic goitre                              | CS | CS |
| E86   | Volume depletion                                   | CS | CS |
| E87.5 | Hyperkalaemia                                      | CS | CS |
| F34.1 | Dysthymia                                          | CS | CS |
| F38   | Other mood [affective] disorders                   | CS | CS |
| F40.1 | Social phobias                                     | CS | CS |
| F43.0 | Acute stress reaction                              | CS | CS |
| G47.9 | Sleep disorder, unspecified                        | CS | CS |
| G82.2 | Paraplegia, unspecified                            | CS | CS |
| H02.9 | Disorder of eyelid, unspecified                    | CS | CS |
| H10.1 | Acute atopic conjunctivitis                        | CS | CS |
| H17   | Corneal scars and opacities                        | CS | CS |
| H35.3 | Degeneration of macula and posterior pole          | CS | CS |
| H52.1 | Myopia                                             | CS | CS |
| H57.1 | Ocular pain                                        | CS | CS |
| H60.9 | Otitis externa, unspecified                        | CS | CS |
| H66.9 | Otitis media, unspecified                          | CS | CS |
| H72   | Perforation of tympanic membrane                   | CS | CS |
| I21.9 | Acute myocardial infarction, unspecified           | CS | CS |
| I50.0 | Congestive heart failure                           | CS | CS |
| I50.1 | Left ventricular failure                           | CS | CS |
| I95.1 | Orthostatic hypotension                            | CS | CS |
| J01   | Acute sinusitis                                    | CS | CS |
| J02   | Acute pharyngitis                                  | CS | CS |
| J30.4 | Allergic rhinitis, unspecified                     | CS | CS |
| J31.0 | Chronic rhinitis                                   | CS | CS |
| K12.0 | Recurrent oral aphthae                             | CS | CS |
| K35   | Acute appendicitis                                 | CS | CS |
| K58   | Irritable bowel syndrome                           | CS | CS |
| K60.2 | Anal fissure, unspecified                          | CS | CS |
| K62.5 | Haemorrhage of anus and rectum                     | CS | CS |
| K80   | Cholelithiasis                                     | CS | CS |
| L02.2 | Cutaneous abscess, furuncle and carbuncle of trunk | CS | CS |
| L28.0 | Lichen simplex chronicus                           | CS | CS |
| L30.9 | Dermatitis, unspecified                            | CS | CS |
| L68.0 | Hirsutism                                          | CS | CS |
| L73.9 | Follicular disorder, unspecified                   | CS | CS |
| L80   | Vitiligo                                           | CS | CS |
| L81.1 | Chloasma                                           | CS | CS |

|       |                                                           |    |    |
|-------|-----------------------------------------------------------|----|----|
| L81.9 | Disorder of pigmentation, unspecified                     | CS | CS |
| L85.3 | Xerosis cutis                                             | CS | CS |
| M13.9 | Arthritis, unspecified                                    | CS | CS |
| M50.3 | Other cervical disc degeneration                          | CS | CS |
| M67.4 | Ganglion                                                  | CS | CS |
| M70.4 | Prepatellar bursitis                                      | CS | CS |
| M72.2 | Plantar fascial fibromatosis                              | CS | CS |
| M75   | Shoulder lesions                                          | CS | CS |
| M75.1 | Rotator cuff syndrome                                     | CS | CS |
| M79.1 | Myalgia                                                   | CS | CS |
| M81.9 | Osteoporosis, unspecified                                 | CS | CS |
| N08.3 | Glomerular disorders in diabetes mellitus                 | CS | CS |
| N10   | Acute tubulo-interstitial nephritis                       | CS | CS |
| N13.3 | Other and unspecified hydronephrosis                      | CS | CS |
| N46   | Male infertility                                          | CS | CS |
| N60   | Benign mammary dysplasia                                  | CS | CS |
| N71   | Inflammatory disease of uterus, except cervix             | CS | CS |
| N72   | Inflammatory disease of cervix uteri                      | CS | CS |
| N73.9 | Female pelvic inflammatory disease, unspecified           | CS | CS |
| N80.0 | Endometriosis of uterus                                   | CS | CS |
| N85.0 | Endometrial glandular hyperplasia                         | CS | CS |
| N86   | Erosion and ectropion of cervix uteri                     | CS | CS |
| N91.1 | Secondary amenorrhoea                                     | CS | CS |
| N92.1 | Excessive and frequent menstruation with irregular cycle  | CS | CS |
| N96   | Habitual aborter                                          | CS | CS |
| N97.9 | Female infertility, unspecified                           | CS | CS |
| Q51.9 | Congenital malformation of uterus and cervix, unspecified | CS | CS |
| R04.0 | Epistaxis                                                 | CS | CS |
| R13   | Dysphagia                                                 | CS | CS |
| R14   | Flatulence and related conditions                         | CS | CS |
| R17   | Unspecified jaundice                                      | CS | CS |
| R20.8 | Other and unspecified disturbances of skin sensation      | CS | CS |
| R22.0 | Localized swelling, mass and lump, head                   | CS | CS |
| R22.3 | Localized swelling, mass and lump, upper limb             | CS | CS |
| R22.4 | Localized swelling, mass and lump, lower limb             | CS | CS |
| R22.4 | Localized swelling, mass and lump, lower limb             | CS | CS |
| R25.2 | Cramp and spasm                                           | CS | CS |
| R26.1 | Paralytic gait                                            | CS | CS |
| R41.3 | Other amnesia                                             | CS | CS |

|              |                                                           |     |     |
|--------------|-----------------------------------------------------------|-----|-----|
| R45.8        | Other symptoms and signs involving emotional state        | CS  | CS  |
| R63.4        | Abnormal weight loss                                      | CS  | CS  |
| S61          | Open wound of wrist and hand                              | CS  | CS  |
| S62.8        | Fracture of other and unspecified parts of wrist and hand | CS  | CS  |
| S63.5        | Sprain and strain of wrist                                | CS  | CS  |
| S82.8        | Fractures of other parts of lower leg                     | CS  | CS  |
| T74.1        | Physical abuse                                            | CS  | CS  |
| T75.3        | Motion sickness                                           | CS  | CS  |
| T78.4        | Allergy, unspecified                                      | CS  | CS  |
| Z74          | Problems related to care-provider dependency              | CS  | CS  |
| Z90.4        | Acquired absence of other parts of digestive tract        | CS  | CS  |
| Z91.5        | Personal history of self-harm                             | CS  | CS  |
| <b>Total</b> |                                                           | 586 | 100 |

Abbreviation: CS, Cell Suppression. Cells with fewer than 5 participants were suppressed to protect participant confidentiality.



**eTable 6.** Frequency of *ICD-10-CM* Diagnoses Among Male Adults 18 Years or Older (n = 45)

| <b>ICD-10-CM code</b> | <b>Description</b>                                                                   | <b>n</b> | <b>%</b> |
|-----------------------|--------------------------------------------------------------------------------------|----------|----------|
| E78                   | Disorders of lipoprotein metabolism and other lipidaemias                            | 11       | 24.4     |
| R10                   | Abdominal and pelvic pain                                                            | 8        | 17.8     |
| K02                   | Dental caries                                                                        | 7        | 15.6     |
| M25.5                 | Pain in joint                                                                        | 6        | 13.3     |
| M54.5                 | Low back pain                                                                        | 6        | 13.3     |
| H53                   | Visual disturbances                                                                  | 5        | 11.1     |
| H91                   | Other hearing loss                                                                   | 5        | 11.1     |
| J06                   | Acute upper respiratory infections of multiple and unspecified sites                 | 5        | 11.1     |
| K08.8                 | Other specified disorders of teeth and supporting structures                         | 5        | 11.1     |
| K59.0                 | Constipation                                                                         | 5        | 11.1     |
| K64                   | Haemorrhoids and perianal venous thrombosis                                          | 5        | 11.1     |
| R21                   | Rash and other nonspecific skin eruption                                             | 5        | 11.1     |
| B98.0                 | Helicobacter pylori [H.pylori] as the cause of diseases classified to other chapters | CS       | CS       |
| I10                   | Essential (primary) hypertension                                                     | CS       | CS       |
| A15.9                 | Respiratory tuberculosis unspecified, confirmed bacteriologically and histologically | CS       | CS       |
| H52                   | Disorders of refraction and accommodation                                            | CS       | CS       |
| K21                   | Gastro-oesophageal reflux disease                                                    | CS       | CS       |
| M79.6                 | Pain in limb                                                                         | CS       | CS       |
| R52                   | Pain, not elsewhere classified                                                       | CS       | CS       |
| A07.8                 | Other specified protozoal intestinal diseases                                        | CS       | CS       |
| B65                   | Schistosomiasis [bilharziasis]                                                       | CS       | CS       |
| E61.1                 | Iron deficiency                                                                      | CS       | CS       |
| E66                   | Obesity                                                                              | CS       | CS       |
| F41                   | Other anxiety disorders                                                              | CS       | CS       |
| F43.8                 | Other reactions to severe stress                                                     | CS       | CS       |
| G44.2                 | Tension-type headache                                                                | CS       | CS       |
| H10                   | Conjunctivitis                                                                       | CS       | CS       |
| H92.0                 | Otalgia                                                                              | CS       | CS       |
| J34.8                 | Other specified disorders of nose and nasal sinuses                                  | CS       | CS       |
| K29.7                 | Gastritis, unspecified                                                               | CS       | CS       |
| L25                   | Unspecified contact dermatitis                                                       | CS       | CS       |
| L30.9                 | Dermatitis, unspecified                                                              | CS       | CS       |
| L90.5                 | Scar conditions and fibrosis of skin                                                 | CS       | CS       |

|       |                                                                        |    |    |
|-------|------------------------------------------------------------------------|----|----|
| M51.1 | Lumbar and other intervertebral disc disorders with radiculopathy      | CS | CS |
| N46   | Male infertility                                                       | CS | CS |
| R42   | Dizziness and giddiness                                                | CS | CS |
| A07.1 | Giardiasis [lambliasis]                                                | CS | CS |
| A09.0 | Other and unspecified gastroenteritis and colitis of infectious origin | CS | CS |
| A63.0 | Anogenital (venereal) warts                                            | CS | CS |
| B35.3 | Tinea pedis                                                            | CS | CS |
| B80   | Enterobiasis                                                           | CS | CS |
| B86   | Scabies                                                                | CS | CS |
| D48.5 | Neoplasm of uncertain or unknown behaviour: Skin                       | CS | CS |
| D50   | Iron deficiency anaemia                                                | CS | CS |
| D56.3 | Thalassaemia trait                                                     | CS | CS |
| D69.6 | Thrombocytopenia, unspecified                                          | CS | CS |
| D72.8 | Other specified disorders of white blood cells                         | CS | CS |
| E34.3 | Short stature, not elsewhere classified                                | CS | CS |
| E53.8 | Deficiency of other specified B group vitamins                         | CS | CS |
| F32.9 | Depressive episode, unspecified                                        | CS | CS |
| F43.0 | Acute stress reaction                                                  | CS | CS |
| F43.1 | Post-traumatic stress disorder                                         | CS | CS |
| G62.9 | Polyneuropathy, unspecified                                            | CS | CS |
| H11.0 | Pterygium                                                              | CS | CS |
| H26   | Other cataract                                                         | CS | CS |
| H44.2 | Degenerative myopia                                                    | CS | CS |
| H52.1 | Myopia                                                                 | CS | CS |
| H52.2 | Astigmatism                                                            | CS | CS |
| H91.3 | Deaf mutism, not elsewhere classified                                  | CS | CS |
| I25   | Chronic ischaemic heart disease                                        | CS | CS |
| J02   | Acute pharyngitis                                                      | CS | CS |
| J02.9 | Acute pharyngitis, unspecified                                         | CS | CS |
| J44   | Other chronic obstructive pulmonary disease                            | CS | CS |
| J45   | Asthma                                                                 | CS | CS |
| K07.6 | Temporomandibular joint disorders                                      | CS | CS |
| K30   | Functional dyspepsia                                                   | CS | CS |
| K35   | Acute appendicitis                                                     | CS | CS |
| K60.2 | Anal fissure, unspecified                                              | CS | CS |
| K76.0 | Fatty (change of) liver, not elsewhere classified                      | CS | CS |
| K76.9 | Liver disease, unspecified                                             | CS | CS |
| L29   | Pruritus                                                               | CS | CS |

|              |                                                          |     |     |
|--------------|----------------------------------------------------------|-----|-----|
| L65          | Other nonscarring hair loss                              | CS  | CS  |
| L70          | Acne                                                     | CS  | CS  |
| L80          | Vitiligo                                                 | CS  | CS  |
| L85.3        | Xerosis cutis                                            | CS  | CS  |
| M13.9        | Arthritis, unspecified                                   | CS  | CS  |
| M22.4        | Chondromalacia patellae                                  | CS  | CS  |
| M54.6        | Pain in thoracic spine                                   | CS  | CS  |
| M62.6        | Muscle strain                                            | CS  | CS  |
| M72.2        | Plantar fascial fibromatosis                             | CS  | CS  |
| M75.1        | Rotator cuff syndrome                                    | CS  | CS  |
| M79.2        | Neuralgia and neuritis, unspecified                      | CS  | CS  |
| M81.9        | Osteoporosis, unspecified                                | CS  | CS  |
| N20.0        | Calculus of kidney                                       | CS  | CS  |
| N39.4        | Other specified urinary incontinence                     | CS  | CS  |
| N40          | Hyperplasia of prostate                                  | CS  | CS  |
| R00.1        | Bradycardia, unspecified                                 | CS  | CS  |
| R01.1        | Cardiac murmur, unspecified                              | CS  | CS  |
| R07          | Pain in throat and chest                                 | CS  | CS  |
| R07.0        | Pain in throat                                           | CS  | CS  |
| R13          | Dysphagia                                                | CS  | CS  |
| R16.0        | Hepatomegaly, not elsewhere classified                   | CS  | CS  |
| R25.1        | Tremor, unspecified                                      | CS  | CS  |
| R30.0        | Dysuria                                                  | CS  | CS  |
| R31          | Unspecified haematuria                                   | CS  | CS  |
| R51          | Headache                                                 | CS  | CS  |
| R62.8        | Other lack of expected normal physiological development  | CS  | CS  |
| R63.0        | Anorexia                                                 | CS  | CS  |
| S20.2        | Contusion of thorax                                      | CS  | CS  |
| S32.0        | Fracture of lumbar vertebra                              | CS  | CS  |
| S62.6        | Fracture of other finger                                 | CS  | CS  |
| S82.8        | Fractures of other parts of lower leg                    | CS  | CS  |
| S83.6        | Sprain and strain of other and unspecified parts of knee | CS  | CS  |
| Z60.9        | Problem related to social environment, unspecified       | CS  | CS  |
| <b>Total</b> |                                                          | 198 | 100 |

Abbreviation: CS, Cell Suppression. Cells with fewer than 5 participants were suppressed to protect participant confidentiality.
