# Supplementary material for: Sociodemographic Characteristics and Mental and Physical Health Diagnoses of Yazidi Refugees Who Survived the Daesh Genocide and Resettled in Canada
Source: PubMed Central journal article supplement (PMC10339151; doi:10.1001/jamanetworkopen.2023.23064), 2023-07-12
Supplement: jamanetwopen-e2323064-s002.pdf [file jamanetwopen-e2323064-s002.pdf]

## Data Sharing Statement

Hassan. Sociodemographic Characteristics and Mental and Physical Health Diagnoses of Yazidi Refugees Who Survived the Daesh Genocide and Resettled in Canada. *JAMA Network Open*. Published July 12, 2023. doi:10.1001/jamanetworkopen.2023.23064

### Data

**Data available:** No

### Additional Information

**Explanation for why data not available:** We are limited by our research agreement with the data custodian and ethics certificates by our institution which do not permit open data sharing. In these agreements, we are only permitted, upon request, to share a completely de-identified dataset with a journal to assist with verification of our analyses.
